# Supplementary material
Source: publisher figshare collection journal article supplement (https://sage.figshare.com/ndownloader/files/12540221)
Supplement: Supplementary file 1 [file 12540221]

SUPPLEMENTAL TABLE. Readmission within 30 days related to fracture.

| Reason for ED visit | Number of patients | Call prior to ED presentation | Inpatient admission from ED |
| --- | --- | --- | --- |
| Dissatisfaction with pain relief | 4 | No | No |
| Fall onto ipsilateral extremity | 1 | No | No |
| Concerns about signs and symptoms related to surgery: Ecchymosis | 1 | No | No |
| Concerns about signs and symptoms related to surgery: Bleeding | 1 | Yes | No |
| Concerns about signs and symptoms related to surgery: Swelling | 1 | No | No |
